# Supplementary material for: Development of Hindi-Translated Version of the Female Sexual Function Index for Evaluating Sexual Dysfunctions among Individuals with Anxiety, Depression, and Other Common Mental Health Conditions: Experiential Account and Preliminary Findings from India
Source: MDPI journal article supplement (doi:10.3390/psychiatryint4020018), 2023-06-15
Supplement: s1 [file s1]

**Supplementary Table S1: Table depicting the findings of the expert panel discussion on the Pre-final Hindi version of the FSFI, and the subsequent revision**

| Item. No | Original FSFI                                                                                      | English-backtranslation of the FSFI                                                                                                                                      | FSFI-Hindi (pre-final version)                                                                                                                                          | FSFI HINDI (Post expert discussion)                                                                                                                                                                                           | Remarks                                                                                                                                                                                                                                          |
|----------|----------------------------------------------------------------------------------------------------|--------------------------------------------------------------------------------------------------------------------------------------------------------------------------|-------------------------------------------------------------------------------------------------------------------------------------------------------------------------|-------------------------------------------------------------------------------------------------------------------------------------------------------------------------------------------------------------------------------|--------------------------------------------------------------------------------------------------------------------------------------------------------------------------------------------------------------------------------------------------|
| 1.       | Over the past 4 weeks, how <b>often</b> did you feel sexual desire or interest?                    | How many times have you desired to have sex in the last 4 weeks?<br><br>5. Almost always<br>4. Most of the time<br>3. Never<br>2. More than few times<br>1. Almost never | पिछले चार सप्ताह में कितनी बार आपको संभोग करने की इच्छा हुई?<br><br>5. लगभग हमेशा<br>4. ज्यादातर (आधे समय)<br>3. कभी नहीं<br>2. कुछ बार से ज्यादा<br>1. कभी नहीं (लगभग) | पिछले चार सप्ताह में आपको <u>कितनी बार</u> यौन इच्छा हुई?<br><br>5. लगभग हमेशा / हमेशा<br>4. ज्यादातर (आधे समय से ज्यादा)<br>3. कभी-कभी (लगभग आधे समय)<br>2. कुछ बार/ थोड़ा बहुत (आधे समय से कम)<br>1. कभी नहीं/लगभग कभी नहीं | <ul style="list-style-type: none"> <li>•The word 'sambhog' (intercourse) was replaced with 'yaun' (Sexual) as the sexual desire was the original word in the original scale.</li> <li>•The multiple-choice options were made uniform.</li> </ul> |
| 2.       | Over the past 4 weeks, how would you rate your <b>level</b> (degree) of sexual desire or interest? | How will you experience your desire or interest in having sex in the last 4 weeks?<br><br>5.Very much<br>4.Much<br>3.Medium<br>2.Lower                                   | पिछले चार सप्ताह में आप अपनी संभोग करने की इच्छा या रुचि को किस तरह आकेंगे?<br><br>5. बहुत अधिक<br>4 अधिक<br>3. मध्यम<br>2. निम्न<br>1. बहुत निम्न अथवा बिल्कुल भी नहीं | पिछले चार सप्ताह में आप अपनी यौन इच्छा के <u>स्तर</u> को किस तरह आकेंगे?<br><br>5. बहुत अधिक<br>4. अधिक<br>3. मध्यम<br>2. निम्न<br>1. बहुत निम्न/बिल्कुल भी नहीं                                                              | <ul style="list-style-type: none"> <li>•Consistent with the prior changes, the word '<u>star</u>' was added to measure the word level/degree.</li> </ul>                                                                                         |

|    |                                                                                                                            |                                                                                                                                                                                                                                                                                                                                |                                                                                                                                                                                                                                                                                                    |                                                                                                                                                                                                                                                                                                                              |                                                                                                                                                                                                                                                                  |
|----|----------------------------------------------------------------------------------------------------------------------------|--------------------------------------------------------------------------------------------------------------------------------------------------------------------------------------------------------------------------------------------------------------------------------------------------------------------------------|----------------------------------------------------------------------------------------------------------------------------------------------------------------------------------------------------------------------------------------------------------------------------------------------------|------------------------------------------------------------------------------------------------------------------------------------------------------------------------------------------------------------------------------------------------------------------------------------------------------------------------------|------------------------------------------------------------------------------------------------------------------------------------------------------------------------------------------------------------------------------------------------------------------|
|    |                                                                                                                            | 1.Very low or none                                                                                                                                                                                                                                                                                                             |                                                                                                                                                                                                                                                                                                    |                                                                                                                                                                                                                                                                                                                              |                                                                                                                                                                                                                                                                  |
| 3. | Over the past 4 weeks, how <b>often</b> did you feel sexually aroused ("turned on") during sexual activity or intercourse? | <p>How many times have you felt sexual arousal during sexual activity or intercourse in the past 4 weeks?</p> <p>0.No sexual activity</p> <p>5.Mostly always</p> <p>4.most of the time (more than half the time)</p> <p>3.Sometimes about half the time</p> <p>2.sometimes (less than half the time)</p> <p>1.almost never</p> | <p>पिछले चार सप्ताह में आपने कितनी बार यौनक्रिया या संभोग के दौरान यौन उत्तेजना महसूस की है?</p> <p>0. कोई यौनक्रिया नहीं</p> <p>5. ज्यादातर, हमेशा</p> <p>4. अधिकांशवार (आधे से अधिक बार)</p> <p>3. कभी-कभी (लगभग आधा समय)</p> <p>2. कभी-कभी (आधे समय से कम)</p> <p>1. लगभग कभी नहीं/कभी नहीं</p> | <p>पिछले चार सप्ताह में यौनक्रिया या संभोग के दौरान आपने <u>कितनी बार</u> यौन उत्तेजना महसूस की है?</p> <p>0. कोई यौनक्रिया नहीं हुई</p> <p>5. लगभग हमेशा / हमेशा</p> <p>4. ज्यादातर (आधे समय से ज्यादा)</p> <p>3. कभी-कभी (लगभग आधे समय)</p> <p>2. कुछ बार/ थोड़ा बहुत (आधे समय से कम)</p> <p>1. कभी नहीं/लगभग कभी नहीं</p> | <ul style="list-style-type: none"> <li>•The sentence was rephrased (word <u>kitni bar/often</u> was moved before yaun uttejna to sexual arousal (turned on) in the question to capture the idea.</li> <li>•Multiple choice options were made uniform.</li> </ul> |
| 4. | Over the past 4 weeks, how would you rate your <b>level</b> of sexual arousal ("turn on") during sexual activity or        | <p>How would you experience your level of arousal during sexual activity or intercourse?</p>                                                                                                                                                                                                                                   | <p>आप यौन गतिविधि या संभोग के दौरान उत्तेजना के अपने स्तर को आप कैसे आकेंगे?</p> <p>0. कोई यौनक्रिया नहीं</p> <p>5. बहुत अधिक</p>                                                                                                                                                                  | <p>पिछले चार सप्ताह में यौन गतिविधि या संभोग के दौरान उत्तेजना के <u>स्तर</u> को आप कैसे आकेंगे?</p> <p>0. कोई यौनक्रिया नहीं हुई</p> <p>5. बहुत अधिक</p>                                                                                                                                                                    | <ul style="list-style-type: none"> <li>•Like above, the question was reframed.</li> </ul>                                                                                                                                                                        |

|    |                                                                                                                             |                                                                                                                                                                                                                                                                 |                                                                                                                                                                                                                                                             |                                                                                                                                                                                                                                                                                            |                                                                                                                                                                                                                                                                                                                                                                                                |
|----|-----------------------------------------------------------------------------------------------------------------------------|-----------------------------------------------------------------------------------------------------------------------------------------------------------------------------------------------------------------------------------------------------------------|-------------------------------------------------------------------------------------------------------------------------------------------------------------------------------------------------------------------------------------------------------------|--------------------------------------------------------------------------------------------------------------------------------------------------------------------------------------------------------------------------------------------------------------------------------------------|------------------------------------------------------------------------------------------------------------------------------------------------------------------------------------------------------------------------------------------------------------------------------------------------------------------------------------------------------------------------------------------------|
|    | intercourse?                                                                                                                | 0.No sexual activity<br>5.Very much<br>4.More<br>3.Medium<br>2.Lower<br>1.Very low or none                                                                                                                                                                      | 4. अधिक<br>3. मध्यम<br>2. निम्न<br>1. बहुत निम्न/बिल्कुल भी नहीं                                                                                                                                                                                            | 4. अधिक<br>3. मध्यम<br>2. निम्न<br>1. अति निम्न/बिल्कुल भी नहीं                                                                                                                                                                                                                            |                                                                                                                                                                                                                                                                                                                                                                                                |
| 5. | Over the past 4 weeks, how <b>confident</b> were you about becoming sexually aroused during sexual activity or intercourse? | How confident you were about having sexual arousal during sexual activity or intercourse in the past 4 weeks?<br>0. No sexual activity<br>5. Overconfidence<br>4.High confidence<br>3.Moderate confidence<br>2.Low confidence<br>1.Very little or no confidence | पिछले चार सप्ताह में आप यौन गतिविधि या संभोग के दौरान यौन उत्तेजना होने के बारे में कितने आश्वस्त थे?<br>0. कोई यौनक्रिया नहीं<br>5. अति आत्मविश्वास<br>4. उच्च आत्मविश्वास<br>3. मध्यम आत्मविश्वास<br>2. निम्न आत्मविश्वास<br>1. बहुत कम/निम्न आत्मविश्वास | पिछले चार सप्ताह में आपको <u>कितना आत्मविश्वास</u> था कि यौन गतिविधि या संभोग के दौरान यौन उत्तेजना हो जाएगी?<br>0. कोई यौनक्रिया नहीं हुई<br>5. अति उच्च आत्मविश्वास<br>4. उच्च आत्मविश्वास<br>3. मध्यम आत्मविश्वास<br>2. निम्न आत्मविश्वास<br>1. बहुत निम्न/ बिल्कुल भी आत्मविश्वास नहीं | <ul style="list-style-type: none"> <li>•The question was rephrased, and 'aashvasta' was replaced with 'aatmavishvas' to <b>assess the confidence of being sexually aroused.</b></li> <li>•It was also discussed the question depicted that woman is being solely responsible for the sexual arousal, hence, to get the sense of mutual participation of the partner and capture the</li> </ul> |

|    |                                                                                                                                       |                                                                                                                                                                                                                                                                                                                                      |                                                                                                                                                                                                                                                                              |                                                                                                                                                                                                                                                                                                         |                                                                           |
|----|---------------------------------------------------------------------------------------------------------------------------------------|--------------------------------------------------------------------------------------------------------------------------------------------------------------------------------------------------------------------------------------------------------------------------------------------------------------------------------------|------------------------------------------------------------------------------------------------------------------------------------------------------------------------------------------------------------------------------------------------------------------------------|---------------------------------------------------------------------------------------------------------------------------------------------------------------------------------------------------------------------------------------------------------------------------------------------------------|---------------------------------------------------------------------------|
|    |                                                                                                                                       |                                                                                                                                                                                                                                                                                                                                      |                                                                                                                                                                                                                                                                              |                                                                                                                                                                                                                                                                                                         | idea question was rephrased.                                              |
| 6. | Over the past 4 weeks, how <b>often</b> have you been satisfied with your arousal (excitement) during sexual activity or intercourse? | How many times in the past 4 weeks have you been satisfied with your arousal during sexual activity or intercourse?<br><br>0.No sexual activity<br><br>5.Mostly always<br><br>4.most of the time (more than half the time)<br><br>3.Sometimes about half the time<br><br>2.sometimes (less than half the time)<br><br>1.almost never | पिछले चार सप्ताह में आप कितनी बार यौनक्रिया या संभोग के दौरान अपनी उत्तेजना से संतुष्ट हुए हैं?<br><br>0. कोई यौनक्रिया नहीं<br>5. ज्यादातर, हमेशा<br>4. अधिकांशवार (आधे से अधिक)<br>3. कभी कभी (लगभग आधा समय)<br>2. कभी- कभी (आधे समय से कम)<br>1. लगभग कभी नहीं (कभी नहीं) | पिछले चार सप्ताह में यौनक्रिया या संभोग के दौरान आप <u>कितनी बार</u> अपनी उत्तेजना से संतुष्ट हुए हैं?<br><br>0. कोई यौनक्रिया नहीं हुई<br>5. लगभग हमेशा / हमेशा<br>4. ज्यादातर (आधे समय से ज्यादा)<br>3. कभी-कभी (लगभग आधे समय)<br>2. कुछ बार/ थोड़ा बहुत (आधे समय से कम)<br>1. कभी नहीं/लगभग कभी नहीं | •The item was rephrased.                                                  |
| 7. | Over the past 4 weeks, how <b>often</b> did you become                                                                                | How many times have you gotten wet during sex in the last 4 weeks?                                                                                                                                                                                                                                                                   | पिछले चार सप्ताह में आप कितनी बार यौनक्रिया के दौरान चिकनाई (गीले) हुए हैं?                                                                                                                                                                                                  | पिछले चार सप्ताह में यौनक्रिया के दौरान आपने <u>कितनी बार</u> यौनिस्राव (गीलापन) महसूस किया?                                                                                                                                                                                                            | •The word dauran chikanai (Geele) was replaced by 'yauni-srav (geelapan)' |

|    |                                                                                                                        |                                                                                                                                                                                                                  |                                                                                                                                                                                                            |                                                                                                                                                                                                                                                   |                                                                                                                                                                                 |
|----|------------------------------------------------------------------------------------------------------------------------|------------------------------------------------------------------------------------------------------------------------------------------------------------------------------------------------------------------|------------------------------------------------------------------------------------------------------------------------------------------------------------------------------------------------------------|---------------------------------------------------------------------------------------------------------------------------------------------------------------------------------------------------------------------------------------------------|---------------------------------------------------------------------------------------------------------------------------------------------------------------------------------|
|    | lubricated ("wet") during sexual activity or intercourse?                                                              | <p>0.No sexual activity</p> <p>5.Mostly always</p> <p>4.most of the time (more than half the time)</p> <p>3.Sometimes about half the time</p> <p>2.sometimes (less than half the time)</p> <p>1.almost never</p> | <p>0. कोई यौनक्रिया नहीं</p> <p>5. ज्यादातर, हमेशा</p> <p>4. अधिकांशवार (आधे से अधिक बार)</p> <p>3. कभी-कभी (लगभग आधा समय)</p> <p>2. कभी- कभी (आधे समय से कम)</p> <p>1. लगभग कभी नहीं (कभी नहीं)</p>       | <p>0. कोई यौनक्रिया नहीं हुई</p> <p>5. लगभग हमेशा / हमेशा</p> <p>4. ज्यादातर (आधे समय से ज्यादा)</p> <p>3. कभी-कभी (लगभग आधे समय)</p> <p>2. कुछ बार/ थोड़ा बहुत (आधे समय से कम)</p> <p>1. कभी नहीं/लगभग कभी नहीं</p>                              | <p>•The word 'mehsus' was added to capture the word feeling.</p>                                                                                                                |
| 8. | Over the past 4 weeks, how <b>difficult</b> was it to become lubricated ("wet") during sexual activity or intercourse? | <p>How difficult it was for you to get wet during intercourse?</p> <p>0.No sexual activity</p> <p>1.tremely difficult/ Impossible</p> <p>2.Very difficult</p> <p>3.Difficult</p> <p>4.Mild hard</p>              | <p>संभोग के दौरान आपके लिए चिकनाई (गीला) होना कितना मुश्किल था?</p> <p>0. कोई यौनक्रिया नहीं</p> <p>1. अत्याधिक कठिन</p> <p>2. बहुत कठिन</p> <p>3. कठिन</p> <p>4. हल्का कठिन</p> <p>5. कोई कठिनाई नहीं</p> | <p>पिछले चार सप्ताह में संभोग के दौरान आपके लिए यौनस्राव (गीलापन) महसूस होना <u>कितना कठिन</u> था?</p> <p>0. कोई यौनक्रिया नहीं हुई</p> <p>1. अत्याधिक कठिन</p> <p>2. बहुत कठिन</p> <p>3. कठिन</p> <p>4. थोड़ा कठिन</p> <p>5. कोई कठिनाई नहीं</p> | <p>•As per the original scale, the question was reframed, i.e., how difficult was it to become lubricated, changed to 'yauni-srav (geelapan) mehsus hon akitna kathin tha?'</p> |

|     |                                                                                                                                           |                                                                                                                                                                                                                                                                                                                                |                                                                                                                                                                                                                                                                                                           |                                                                                                                                                                                                                                                                                                                                 |                                                                                                                                                                |
|-----|-------------------------------------------------------------------------------------------------------------------------------------------|--------------------------------------------------------------------------------------------------------------------------------------------------------------------------------------------------------------------------------------------------------------------------------------------------------------------------------|-----------------------------------------------------------------------------------------------------------------------------------------------------------------------------------------------------------------------------------------------------------------------------------------------------------|---------------------------------------------------------------------------------------------------------------------------------------------------------------------------------------------------------------------------------------------------------------------------------------------------------------------------------|----------------------------------------------------------------------------------------------------------------------------------------------------------------|
|     |                                                                                                                                           | 5.No difficulty                                                                                                                                                                                                                                                                                                                |                                                                                                                                                                                                                                                                                                           |                                                                                                                                                                                                                                                                                                                                 |                                                                                                                                                                |
| 9.  | Over the past 4 weeks, how often did you <b>maintain</b> your lubrication ("wetness") until completion of sexual activity or intercourse? | <p>How many times have you called in the past 4 weeks to maintain your wetness until intercourse is over?</p> <p>0.No sexual activity</p> <p>5.Mostly always</p> <p>4.most of the time (more than half the time)</p> <p>3.Sometimes about half the time</p> <p>2.sometimes (less than half the time)</p> <p>1.almost never</p> | <p>पिछले चार हफ्ते में आपने कितनी बार यौनक्रिया या संभोग पूरा होने तक अपनी चिकनाई (गीलापन) बनाए रखा?</p> <p>0. कोई यौनक्रिया नहीं</p> <p>5. ज्यादातर, हमेशा</p> <p>4. अधिकांशवार (आधे से अधिक)</p> <p>3. कभी-कभी (लगभग आधा समय)</p> <p>2. कभी- कभी (आधे समय से कम)</p> <p>1. लगभग कभी नहीं (कभी नहीं)</p> | <p>पिछले चार सप्ताह में यौनक्रिया या संभोग के अंत तक कितनी बार आपका यौनिस्राव (गीलापन) <u>बना रहा?</u></p> <p>0. कोई यौनक्रिया नहीं हुई</p> <p>5. लगभग हमेशा / हमेशा</p> <p>4. ज्यादातर (आधे समय से ज्यादा)</p> <p>3. कभी-कभी (लगभग आधे समय)</p> <p>2. कुछ बार/ थोड़ा बहुत (आधे समय से कम)</p> <p>1. कभी नहीं/लगभग कभी नहीं</p> | <p>•The question was paraphrased and converted to passive voice (ie., chiknai (geelapan) banayrakha was changed to yauni-srav (geelapan)<u>bana raha</u>).</p> |
| 10. | Over the past 4 weeks, how <b>difficult</b> was it to maintain your lubrication ("wetness") until                                         | <p>How difficult it was to maintain your vaginal wetness in the last 4 weeks until the end of vaginal activity?</p>                                                                                                                                                                                                            | <p>पिछले चार सप्ताह में यौनक्रिया के पूरा होने तक आपके यौनिस्राव (गीलापन) को बनाए रखना कितना मुश्किल था?</p> <p>0. कोई यौनक्रिया नहीं</p> <p>1. अत्यधिक कठिन</p>                                                                                                                                          | <p>पिछले चार सप्ताह में यौनक्रिया के अंत तक यौनिस्राव (गीलापन) बनाए रखना आपके लिये <u>कितना कठिन</u> था?</p> <p>0. कोई यौनक्रिया नहीं हुई</p> <p>1. अत्यधिक कठिन</p> <p>2. बहुत कठिन</p>                                                                                                                                        | <p>•Similar as above</p>                                                                                                                                       |

|     |                                                                                                                        |                                                                                                                                                                                                                                                                                         |                                                                                                                                                                                                                                                                                 |                                                                                                                                                                                                                                                                                                        |                                                                                                                                                                                  |
|-----|------------------------------------------------------------------------------------------------------------------------|-----------------------------------------------------------------------------------------------------------------------------------------------------------------------------------------------------------------------------------------------------------------------------------------|---------------------------------------------------------------------------------------------------------------------------------------------------------------------------------------------------------------------------------------------------------------------------------|--------------------------------------------------------------------------------------------------------------------------------------------------------------------------------------------------------------------------------------------------------------------------------------------------------|----------------------------------------------------------------------------------------------------------------------------------------------------------------------------------|
|     | completion of sexual activity or intercourse?                                                                          | 0.No sexual activity<br>1.extremely difficult/ Impossible<br>2.Very difficult<br>3.Difficult<br>4.Mild hard<br>5.No difficulty                                                                                                                                                          | 2. बहुत कठिन<br>3. कठिन<br>4. हल्का कठिन<br>5. कोई कठिनाई नहीं                                                                                                                                                                                                                  | 3. कठिन<br>4. थोड़ा कठिन<br>5. कोई कठिनाई नहीं                                                                                                                                                                                                                                                         |                                                                                                                                                                                  |
| 11. | Over the past 4 weeks, when you had sexual stimulation or intercourse, how <b>often</b> did you reach orgasm (climax)? | In the last 4 weeks, when you had sexual stimulation or sexual intercourse, how many times did you reach orgasm?<br>0.No sexual activity<br>5.Mostly always<br>4.most of the time (more than half the time)<br>3.Sometimes about half the time<br>2.sometimes (less than half the time) | पिछले चार सप्ताह में जब आपने यौन उत्तेजना या संभोग किया था, तो आप कितनी बार संभोग सुख तक पहुंच गए?<br>0. कोई यौनक्रिया नहीं<br>5. ज्यादातर, हमेशा<br>4. अधिकांशवार (आधे से अधिक बार)<br>3. कभी-कभी (लगभग आधा समय)<br>2. कभी- कभी (आधे समय से कम)<br>1. लगभग कभी नहीं (कभी नहीं) | पिछले चार सप्ताह में यौन उत्तेजना या संभोग के दौरान आप <u>कितनी बार</u> यौन चरम (संभोग सुख) तक पहुंच पाए?<br>0. कोई यौनक्रिया नहीं हुई<br>5. लगभग हमेशा / हमेशा<br>4. ज्यादातर (आधे समय से ज्यादा)<br>3. कभी-कभी (लगभग आधे समय)<br>2. कुछ बार/ थोड़ा बहुत (आधे समय से कम)<br>1. कभी नहीं/लगभग कभी नहीं | <ul style="list-style-type: none"> <li>• For the word orgasm (climax), 'yaunchram (sambhog sukh)' was added, and</li> <li>• Question was reframed into passive voice.</li> </ul> |

|     |                                                                                                                                        |                                                                                                                                                                                                                                                         |                                                                                                                                                                                                                                                                                      |                                                                                                                                                                                                                                                                                                                        |                                                                                                                                                                                                                                      |
|-----|----------------------------------------------------------------------------------------------------------------------------------------|---------------------------------------------------------------------------------------------------------------------------------------------------------------------------------------------------------------------------------------------------------|--------------------------------------------------------------------------------------------------------------------------------------------------------------------------------------------------------------------------------------------------------------------------------------|------------------------------------------------------------------------------------------------------------------------------------------------------------------------------------------------------------------------------------------------------------------------------------------------------------------------|--------------------------------------------------------------------------------------------------------------------------------------------------------------------------------------------------------------------------------------|
|     |                                                                                                                                        | 1.almost never                                                                                                                                                                                                                                          |                                                                                                                                                                                                                                                                                      |                                                                                                                                                                                                                                                                                                                        |                                                                                                                                                                                                                                      |
| 12. | Over the past 4 weeks, when you had sexual stimulation or intercourse, how <b>difficult</b> was it for you to reach orgasm (climax)?   | <p>How hard was it for you to reach an orgasm every time you had sex in the last 4 weeks?</p> <p>0.No sexual activity</p> <p>1.extremely difficult/ Impossible</p> <p>2.Very difficult</p> <p>3.Difficult</p> <p>4.Mild hard</p> <p>5.No difficulty</p> | <p>पिछले चार सप्ताह में जब भी आपने संभोग किया था, तो आपके लिए चरम सीमा तक जाना कितना मुश्किल था?</p> <p>0. कोई यौनक्रिया नहीं</p> <p>1. अत्याधिक कठिन</p> <p>2. बहुत कठिन</p> <p>3. कठिन</p> <p>4. हल्का कठिन</p> <p>5. कोई कठिनाई नहीं</p>                                          | <p>पिछले चार सप्ताह में यौन उत्तेजना या संभोग के दौरान आपके लिए यौन चरम (संभोग सुख) तक पहुंचना <u>कितना कठिन</u> था?</p> <p>0. कोई यौनक्रिया नहीं हुई</p> <p>1. अत्याधिक कठिन/ असंभव</p> <p>2. बहुत कठिन</p> <p>3. कठिन</p> <p>4. थोड़ा कठिन</p> <p>5. कोई कठिनाई नहीं</p>                                             | <ul style="list-style-type: none"> <li>•For the word orgasm (climax), ‘yaunchram (sambhog sukh)’ was added</li> <li>•to capture the idea of difficulty in maintain orgasm, ‘mushkil’ was replaced with the word ‘kathin’.</li> </ul> |
| 13. | Over the past 4 weeks, how <b>satisfied</b> were you with your ability to reach orgasm (climax) during sexual activity or intercourse? | <p>How satisfied you were with sexual activity or ability to reach orgasm during intercourse in the past 4 weeks?</p> <p>0.No sexual activity</p> <p>5.More satisfaction</p> <p>4.Limited satisfaction</p> <p>3.equal atisfaction dissatisfaction</p>   | <p>पिछले चार सप्ताह में आप यौन गतिविधि या संभोग के दौरान संभोग सुख तक पहुंचने की क्षमता से कितने संतुष्ट थे?</p> <p>0. कोई यौनक्रिया नहीं</p> <p>5. अधिक संतुष्टि</p> <p>4. सीमित संतुष्टि</p> <p>3. संतुष्टि असंतुष्टि बराबर</p> <p>2. सीमित असंतुष्टि</p> <p>1. अधिक असंतुष्टि</p> | <p>पिछले चार सप्ताह में यौन गतिविधि या संभोग के दौरान आप यौन चरम (संभोग सुख) तक पहुंचने की क्षमता से <u>कितने संतुष्ट</u> थे?</p> <p>0. कोई यौनक्रिया नहीं हुई</p> <p>5. बहुत/ अति संतुष्ट</p> <p>4. मध्यम संतुष्ट</p> <p>3. लगभग बराबर संतुष्ट एवं असंतुष्ट</p> <p>2. मध्यम असंतुष्ट</p> <p>1. बहुत/ अति असंतुष्ट</p> | <p>For the word orgasm (climax), ‘yaunchram (sambhog yaunchram (sambhog sukh)’ was added.</p>                                                                                                                                        |



|     |                                                                                                                                                       |                                                                                                                                                                                                                                                                                                            |                                                                                                                                                                                                                                                     |                                                                                                                                                                                                                                                                             |                                                                                               |
|-----|-------------------------------------------------------------------------------------------------------------------------------------------------------|------------------------------------------------------------------------------------------------------------------------------------------------------------------------------------------------------------------------------------------------------------------------------------------------------------|-----------------------------------------------------------------------------------------------------------------------------------------------------------------------------------------------------------------------------------------------------|-----------------------------------------------------------------------------------------------------------------------------------------------------------------------------------------------------------------------------------------------------------------------------|-----------------------------------------------------------------------------------------------|
|     |                                                                                                                                                       | 2.Limited dissatisfaction<br><br>1.more dissatisfaction                                                                                                                                                                                                                                                    |                                                                                                                                                                                                                                                     |                                                                                                                                                                                                                                                                             |                                                                                               |
| 14. | Over the past 4 weeks, how <b>satisfied</b> have you been with the amount of emotional closeness during sexual activity between you and your partner? | How satisfied you were with the emotional closeness between you and your partner during sexual activity over the past 4 weeks?<br><br>0.No sexual activity<br>5.More satisfaction<br>4.Limited satisfaction<br>3.equal satisfaction dissatisfaction<br>2.Limited dissatisfaction<br>1.more dissatisfaction | पिछले चार सप्ताह में आप और आपके साथी के बीच यौनक्रिया के दौरान भावनात्मक निकटता से आप कितना संतुष्ट थे?<br>0. कोई यौनक्रिया नहीं<br>5. अधिक संतुष्टि<br>4. सीमित संतुष्टि<br>3. संतुष्टि असंतुष्टि बराबर<br>2. सीमित असंतुष्टि<br>1. अधिक असंतुष्टि | पिछले चार सप्ताह में यौनक्रिया के दौरान आप और आपके साथी के बीच भावनात्मक निकटता से आप <u>कितना संतुष्ट</u> थे?<br>0. कोई यौनक्रिया नहीं हुई<br>5. बहुत/ अति संतुष्ट<br>4. मध्यम संतुष्ट<br>3. लगभग बराबर संतुष्ट एवं असंतुष्ट<br>2. मध्यम असंतुष्ट<br>1. बहुत/ अति असंतुष्ट | •The question was simplified by rephrasing it.                                                |
| 15. | Over the past 4 weeks, how <b>satisfied</b> have you been with your sexual relationship                                                               | How satisfied were you with your physical relationship with your partner in the last 4 weeks?                                                                                                                                                                                                              | पिछले चार सप्ताह में आप अपने साथी के साथ शारीरिक संबंध से कितने संतुष्ट थे?<br><br>0. कोई यौनक्रिया नहीं                                                                                                                                            | पिछले चार सप्ताह में आप अपने साथी के साथ यौन संबंध से <u>कितने संतुष्ट</u> थे?<br><br>0.<br>5. बहुत/ अति संतुष्ट                                                                                                                                                            | •The words 'sharirik sambandh' (corresponding to physical relationship) was replaced as 'yaun |

|     |                                                                                          |                                                                                                                                                                                                                               |                                                                                                                                                                                                                |                                                                                                                                                                                                                          |                                                                                                                               |
|-----|------------------------------------------------------------------------------------------|-------------------------------------------------------------------------------------------------------------------------------------------------------------------------------------------------------------------------------|----------------------------------------------------------------------------------------------------------------------------------------------------------------------------------------------------------------|--------------------------------------------------------------------------------------------------------------------------------------------------------------------------------------------------------------------------|-------------------------------------------------------------------------------------------------------------------------------|
|     | with your partner?                                                                       | 0.treme satisfaction<br>5.Limited satisfaction<br>4.Equal satisfaction and dissatisfaction<br>3.Limited dissatisfaction<br>2.More dissatisfaction                                                                             | 5. अधिक संतुष्टि<br>4. सीमित संतुष्टि<br>3. संतुष्टि असंतुष्टि बराबर<br>2. सीमित असंतुष्टि<br>1. अधिक असंतुष्टि                                                                                                | 4. मध्यम संतुष्टि<br>3. लगभग बराबर संतुष्टि एवं असंतुष्टि<br>2. मध्यम असंतुष्टि<br>1. बहुत/ अति असंतुष्टि                                                                                                                | sambandh' (sexual relationship).                                                                                              |
| 16. | Over the past 4 weeks, how <b>satisfied</b> have you been with your overall sexual life? | How satisfied are you with your overall sex life in the last 4 weeks?<br>0.extreme satisfaction<br>5.Limited satisfaction<br>4.Equal satisfaction and dissatisfaction<br>3.Limited dissatisfaction<br>2..More dissatisfaction | पिछले चार सप्ताह में आप अपने संपूर्ण यौन जीवन से कितने संतुष्ट थे?<br>0. कोई यौनक्रिया नहीं<br>5. अधिक संतुष्टि<br>4. सीमित संतुष्टि<br>3. संतुष्टि असंतुष्टि बराबर<br>2. सीमित असंतुष्टि<br>1. अधिक असंतुष्टि | पिछले चार सप्ताह में कुल मिलाके आप अपने यौन जीवन से <u>कितने संतुष्ट</u> थे?<br>0.<br>5. बहुत/ अति संतुष्टि<br>4. मध्यम संतुष्टि<br>3. लगभग बराबर संतुष्टि एवं असंतुष्टि<br>2. मध्यम असंतुष्टि<br>1. बहुत/ अति असंतुष्टि | •The question was paraphrased, with the words of 'overall sexual life 'was translated as 'kul milake' instead of 'sampoorna'. |

|     |                                                                                                              |                                                                                                                                                                                                                                                                                                                         |                                                                                                                                                                                                                                                                                                         |                                                                                                                                                                                                                                                                                                                                  |                                                                                                                                                                                                                                                                     |
|-----|--------------------------------------------------------------------------------------------------------------|-------------------------------------------------------------------------------------------------------------------------------------------------------------------------------------------------------------------------------------------------------------------------------------------------------------------------|---------------------------------------------------------------------------------------------------------------------------------------------------------------------------------------------------------------------------------------------------------------------------------------------------------|----------------------------------------------------------------------------------------------------------------------------------------------------------------------------------------------------------------------------------------------------------------------------------------------------------------------------------|---------------------------------------------------------------------------------------------------------------------------------------------------------------------------------------------------------------------------------------------------------------------|
| 17. | Over the past 4 weeks, how <b>often</b> did you experience discomfort or pain during vaginal penetration?    | <p>How many times have you experienced discomfort or pain during vaginal penetration in the last 4 weeks?</p> <p>0.Never had sex</p> <p>5.Mostly always</p> <p>4.most of the time (more than half the time)</p> <p>3.Sometimes about half the time</p> <p>2.Sometimes less than half the time</p> <p>1.Almost never</p> | <p>पिछले चार सप्ताह में योनी में प्रवेश के दौरान कितनी बार आपने असुविधा या दर्द का अनुभव किया?</p> <p>0. कोई यौनक्रिया नहीं</p> <p>5. ज्यादातर, हमेशा</p> <p>4. अधिकांशवार (आधे से अधिक बार)</p> <p>3. कभी-कभी (लगभग आधा समय)</p> <p>2. कभी- कभी (आधे समय से कम)</p> <p>1. लगभग कभी नहीं (कभी नहीं)</p> | <p>पिछले चार सप्ताह में योनी में प्रवेश के समय में <u>कितनी बार</u> आपने असहजता या दर्द महसूस किया हैं?</p> <p>0. कोई यौनक्रिया नहीं हुई</p> <p>1. लगभग हमेशा / हमेशा</p> <p>2. ज्यादातर (आधे समय से ज्यादा)</p> <p>3. कभी-कभी (लगभग आधे समय)</p> <p>4. कुछ बार/ थोड़ा बहुत (आधे समय से कम)</p> <p>5. कभी नहीं/लगभग कभी नहीं</p> | <ul style="list-style-type: none"> <li>•The word ‘discomfort’ as per the original scale was rephrased as ‘असहजता’ instead of ‘असुविधा’.</li> <li>•The word ‘anubhav’ was replaced with ‘mehsus’ to capture how one ‘felt’ during the vaginal penetration</li> </ul> |
| 18. | Over the past 4 weeks, how <b>often</b> did you experience discomfort or pain following vaginal penetration? | <p>How many times have you experienced discomfort or pain after vaginal penetration in the last 4 weeks?</p> <p>0.Never had sex</p>                                                                                                                                                                                     | <p>पिछले चार सप्ताह में योनी में प्रवेश के दौरान कितनी बार आपको असुविधा या दर्द का अनुभव हुआ?</p> <p>0. कोई यौनक्रिया नहीं</p> <p>5. ज्यादातर, हमेशा</p> <p>4. अधिकांशवार (आधे से अधिक बार)</p> <p>3. कभी-कभी (लगभग आधा समय)</p>                                                                        | <p>पिछले चार सप्ताह में योनी में प्रवेश के पश्चात <u>कितनी बार</u> आपको असहजता या दर्द का महसूस हुआ?</p> <p>0. कोई यौनक्रिया नहीं हुई</p> <p>1. लगभग हमेशा / हमेशा</p> <p>2. ज्यादातर (आधे समय से ज्यादा)</p> <p>3. कभी-कभी (लगभग आधे समय)</p>                                                                                   | <ul style="list-style-type: none"> <li>•The word ‘discomfort’ as per the original scale was rephrased as ‘asahjta.</li> <li>• The word ‘anubhav’ was replaced with ‘mehsus’ to capture how one ‘felt’</li> </ul>                                                    |

|     |                                                                                                                                     |                                                                                                                                                                                                                                    |                                                                                                                                                                                                                                                                   |                                                                                                                                                                                                                                                        |                                                                                                                                                                               |
|-----|-------------------------------------------------------------------------------------------------------------------------------------|------------------------------------------------------------------------------------------------------------------------------------------------------------------------------------------------------------------------------------|-------------------------------------------------------------------------------------------------------------------------------------------------------------------------------------------------------------------------------------------------------------------|--------------------------------------------------------------------------------------------------------------------------------------------------------------------------------------------------------------------------------------------------------|-------------------------------------------------------------------------------------------------------------------------------------------------------------------------------|
|     |                                                                                                                                     | <p>5. Mostly always</p> <p>4. most of the time (more than half the time)</p> <p>3. Sometimes about half the time</p> <p>2. Sometimes less than half the time</p> <p>1. Almost never</p>                                            | <p>2. कभी- कभी (आधे समय से कम)</p> <p>1. लगभग कभी नहीं (कभी नहीं)</p>                                                                                                                                                                                             | <p>4. कुछ बार/ थोड़ा बहुत (आधे समय से कम)</p> <p>5. कभी नहीं/ लगभग कभी नहीं</p>                                                                                                                                                                        | during the vaginal penetration                                                                                                                                                |
| 19. | Over the past 4 weeks, how would you rate your <b>level</b> (degree) of discomfort or pain during or following vaginal penetration? | <p>How would you describe the discomfort or pain you experienced during or after vaginal penetration in the past 4 weeks?</p> <p>1. Did not attempt to have sex</p> <p>2. Very High</p> <p>3. High</p> <p>Medium</p> <p>4. Low</p> | <p>पिछले चार हफ्तों में आप योनी में प्रवेश के दौरान या बाद में होने वाली असुविधा या दर्द को कैसे आँकेंगे?</p> <p>0. यौनक्रिया करने का प्रयास नहीं किया</p> <p>1. अति उच्च</p> <p>2. उच्च</p> <p>3. मध्यम</p> <p>4. निम्न</p> <p>5. अति निम्न/ बिल्कुल भी नहीं</p> | <p>पिछले चार सप्ताह में आप योनी में प्रवेश के दौरान या उसके पश्चात असहजता या दर्द के स्तर को कैसे आँकेंगे?</p> <p>0. कोई यौनक्रिया नहीं हुई</p> <p>1. अत्याधिक</p> <p>2. अधिक</p> <p>3. मध्यम</p> <p>4. निम्न</p> <p>5. अति निम्न/ बिल्कुल भी नहीं</p> | <p>• To capture the notion of discomfort the word 'asuvidha' was replaced by 'asahjata.</p> <p>• Likewise, to capture 'level/degree' of discomfort word 'star' was added.</p> |

|  |  |                        |  |  |  |
|--|--|------------------------|--|--|--|
|  |  | 5. Very low or<br>none |  |  |  |
|--|--|------------------------|--|--|--|

**FSFI: female sexual function index**

**Supplementary Table S2: Changes in the translated-Hindi FSFI questionnaire following the pilot testing (cognitive interviewing)**

|    | Original FSFI                                                                                                              | Questions before cognitive interviewing                                                           | Changes in questions post cognitive interviewing                                          | Remarks/ Suggestions                                                                                                                                                                                           |
|----|----------------------------------------------------------------------------------------------------------------------------|---------------------------------------------------------------------------------------------------|-------------------------------------------------------------------------------------------|----------------------------------------------------------------------------------------------------------------------------------------------------------------------------------------------------------------|
| 1) | Over the past 4 weeks, how <b>often</b> did you feel sexual desire or interest?                                            | पिछले चार सप्ताह में आपको <u>कितनी बार</u> यौन इच्छा हुई?                                         | पिछले चार सप्ताह में आपको <u>कितनी बार</u> सभोग इच्छा हुई?                                | <ul style="list-style-type: none"> <li>'<i>Yaun</i>' word was replaced with word '<i>Sambhog</i>' in Q1 AND Q2 to ask for sexual desire.</li> </ul>                                                            |
| 2) | Over the past 4 weeks, how would you rate your <b>level</b> (degree) of sexual desire or interest?                         | पिछले चार सप्ताह में आप अपनी यौन इच्छा के <u>स्तर</u> को किस तरह आँकेँगे?                         | पिछले चार सप्ताह में आप अपनी सभोग करने की इच्छा के <u>स्तर</u> (लेवल) को किस तरह आँकेँगे? | <ul style="list-style-type: none"> <li>'<i>Level</i>' word (written in Hindi) was added alongside the word 'star' to better capture the level of sexual desire.</li> </ul>                                     |
| 3) | Over the past 4 weeks, how <b>often</b> did you feel sexually aroused ("turned on") during sexual activity or intercourse? | पिछले चार सप्ताह में यौन गतिविधि या सभोग के दौरान आपने <u>कितनी बार</u> यौन उत्तेजना महसूस की है? | पिछले चार सप्ताह में यौनक्रिया के दौरान आपने <u>कितनी बार</u> यौन उत्तेजना महसूस की है?   | <ul style="list-style-type: none"> <li>'<i>Yaunkriya</i>' was found to better be representing the sexual activities, hence, for simplicity, it replaced the word '<i>Yaun gatividhi</i>' in Q3,4,5.</li> </ul> |
| 4) | Over the past 4 weeks, how would you rate your <b>level</b> of sexual arousal ("turn on")                                  | पिछले चार सप्ताह में यौन गतिविधि या सभोग के दौरान                                                 | पिछले चार सप्ताह में यौनक्रिया के दौरान उत्तेजना के <u>स्तर</u> को आप कैसे आँकेँगे?       | <ul style="list-style-type: none"> <li>No change was required.</li> </ul>                                                                                                                                      |

|    |                                                                                                                                       |                                                                                                                       |                                                                                                                       |                                                                                                                                                      |
|----|---------------------------------------------------------------------------------------------------------------------------------------|-----------------------------------------------------------------------------------------------------------------------|-----------------------------------------------------------------------------------------------------------------------|------------------------------------------------------------------------------------------------------------------------------------------------------|
|    | during sexual activity or intercourse?                                                                                                | उत्तेजना के स्तर को आप कैसे आँकेँगे?                                                                                  |                                                                                                                       |                                                                                                                                                      |
| 5) | Over the past 4 weeks, how <b>confident</b> were you about becoming sexually aroused during sexual activity or intercourse?           | पिछले चार सप्ताह में आपको <u>कितना</u> <u>आत्मविश्वास</u> था कि यौन गतिविधि या सञ्भोग के दौरान यौन उत्तेजना हो जाएगी? | पिछले चार सप्ताह में आपको <u>कितना</u> <u>विश्वास</u> था कि यौनक्रिया के दौरान यौन उत्तेजना हो जाएगी?                 | <ul style="list-style-type: none"> <li>• 'Aatmvishvas' (self-confidence) replaced with 'Vishvas' (confidence).</li> </ul>                            |
| 6) | Over the past 4 weeks, how <b>often</b> have you been satisfied with your arousal (excitement) during sexual activity or intercourse? | पिछले चार सप्ताह में यौनक्रिया या सञ्भोग के दौरान आप <u>कितनी बार</u> अपनी उत्तेजना से समुष्ट हुए हैं?                | पिछले चार सप्ताह में यौनक्रिया या सञ्भोग के दौरान आप <u>कितनी बार</u> अपनी उत्तेजना (एक्ससिटेमेंट) से समुष्ट हुए हैं? | <ul style="list-style-type: none"> <li>• No change was required.</li> </ul>                                                                          |
| 7) | Over the past 4 weeks, how <b>often</b> did you become lubricated ("wet") during sexual activity or intercourse?                      | पिछले चार सप्ताह में यौनक्रिया के दौरान आपने <u>कितनी बार</u> गीलापन(यौनिस्राव) महसूस किया?                           | पिछले चार सप्ताह में यौनक्रिया के दौरान आपने <u>कितनी बार</u> गीलापन महसूस किया?                                      | <ul style="list-style-type: none"> <li>• To omit <i>Yauni-srav</i> and only use '<i>geelapan</i>' (for lubrication/wetness) in Q7,8,9,10.</li> </ul> |
| 8) | Over the past 4 weeks, how <b>difficult</b> was it to become lubricated ("wet")                                                       | पिछले चार सप्ताह में सञ्भोग के दौरान आपके लिए गीलापन                                                                  | पिछले चार सप्ताह में सञ्भोग के दौरान यौनि का गीला हो पाना <u>कितना कठिन</u> था?                                       | <ul style="list-style-type: none"> <li>• It was appreciated that the location of lubrication/geelapan should</li> </ul>                              |

|     |                                                                                                                                                 |                                                                                                        |                                                                                                   |                                                                                                                                                                                                                                                                                                                                              |
|-----|-------------------------------------------------------------------------------------------------------------------------------------------------|--------------------------------------------------------------------------------------------------------|---------------------------------------------------------------------------------------------------|----------------------------------------------------------------------------------------------------------------------------------------------------------------------------------------------------------------------------------------------------------------------------------------------------------------------------------------------|
|     | during sexual activity or intercourse?                                                                                                          | (यौनिस्राव) महसूस होना <u>कितना कठिन</u> था?                                                           |                                                                                                   | be specified for better understanding, hence in the revised version ' <i>यौनि का गीला हो पाना</i> ' was specified.                                                                                                                                                                                                                           |
| 9)  | Over the past 4 weeks, how often did you <b>maintain</b> your lubrication ("wetness") until completion of sexual activity or intercourse?       | पिछले चार सप्ताह में यौनक्रिया या सञ्भोग के अक्ष तक कितनी बार आपका गीलापन (यौनिस्राव) <u>बना रहा?</u>  | पिछले चार सप्ताह में यौनक्रिया या सञ्भोग के अक्ष तक कितनी बार आपके यौनि का गीलापन <u>बना रहा?</u> | <ul style="list-style-type: none"> <li>Apart from what described in item no 7, to Highlight key points of the question for better appraisal of specific aspect of the questions by the participants, such as in Q 9- '<i>Ant tak</i>' was highlighted to assess maintenance of lubrication 'until completion' of sexual activity)</li> </ul> |
| 10) | Over the past 4 weeks, how <b>difficult</b> was it to maintain your lubrication ("wetness") until completion of sexual activity or intercourse? | पिछले चार सप्ताह में यौनक्रिया के अक्ष तक यौनिस्राव (गीलापन) बनाए रखना आपके लिये <u>कितना कठिन</u> था? | पिछले चार सप्ताह में यौनक्रिया के अक्ष तक यौनि का गीलापन बना रहना <u>कितना कठिन</u> था?           | <ul style="list-style-type: none"> <li>'<i>Geelapan bana rahana</i>' instead of '<i>Geelapan banaein rakhna</i>' as it is a physiological response and not a voluntary aspect.</li> </ul>                                                                                                                                                    |



|     |                                                                                                                                        |                                                                                                                               |                                                                                                           |                                                                                                                                                                                                                                                                                                                                                                                           |
|-----|----------------------------------------------------------------------------------------------------------------------------------------|-------------------------------------------------------------------------------------------------------------------------------|-----------------------------------------------------------------------------------------------------------|-------------------------------------------------------------------------------------------------------------------------------------------------------------------------------------------------------------------------------------------------------------------------------------------------------------------------------------------------------------------------------------------|
| 11) | Over the past 4 weeks, when you had sexual stimulation or intercourse, how <b>often</b> did you reach orgasm (climax)?                 | पिछले चार सप्ताह में यौन उत्तेजना या सञ्भोग के दौरान आप <u>कितनी बार</u> यौन चरम (सञ्भोग सुख) तक पहुँच पाए                    | पिछले चार सप्ताह में यौनक्रिया-उकसाव के दौरान आप <u>कितनी बार</u> सञ्भोग सुख तक पहुँच पाए?                | <ul style="list-style-type: none"> <li>To discuss with an expert about a better Hindi word for sexual stimulation and sexual excitement (‘<i>Yaun uttejna</i>’) required for Q 11.</li> <li>Subsequently, after getting an opinion of the expert who was well versed with both the concept and Hindi language ‘<i>Yaun-kriya uksav</i>’ was found to be most appropriate term.</li> </ul> |
| 12) | Over the past 4 weeks, when you had sexual stimulation or intercourse, how <b>difficult</b> was it for you to reach orgasm (climax)?   | पिछले चार सप्ताह में यौन उत्तेजना या सञ्भोग के दौरान आपके लिए यौन चरम (सञ्भोग सुख) तक पहुँचना <u>कितना कठिन</u> था?           | पिछले चार सप्ताह में यौन उत्तेजना या सञ्भोग के दौरान आपके लिए सञ्भोग सुख तक पहुँचना <u>कितना कठिन</u> था? | <ul style="list-style-type: none"> <li>To use ‘<i>sambhog sukh</i>’ only as ‘<i>yaun charam</i>’ was difficult to comprehend by the participants.</li> </ul>                                                                                                                                                                                                                              |
| 13) | Over the past 4 weeks, how <b>satisfied</b> were you with your ability to reach orgasm (climax) during sexual activity or intercourse? | पिछले चार सप्ताह में यौन गतिविधि या सञ्भोग के दौरान आप यौन चरम (सञ्भोग सुख) तक पहुँचने की क्षमता से <u>कितने सन्तुष्ट</u> थे? | पिछले चार सप्ताह में सञ्भोग क्रिया के दौरान आप सञ्भोग से प्राप्त सुख से <u>कितने सन्तुष्ट</u> थे?         | <ul style="list-style-type: none"> <li>The statement was rephrased to bring about the clarity.</li> <li>Kshmata (representing capacity) word was</li> </ul>                                                                                                                                                                                                                               |

|     |                                                                                                                                                       |                                                                                                               |                                                                                                               |                                                                                                                                                    |
|-----|-------------------------------------------------------------------------------------------------------------------------------------------------------|---------------------------------------------------------------------------------------------------------------|---------------------------------------------------------------------------------------------------------------|----------------------------------------------------------------------------------------------------------------------------------------------------|
|     |                                                                                                                                                       |                                                                                                               |                                                                                                               | removed as it was misleading.                                                                                                                      |
| 14) | Over the past 4 weeks, how <b>satisfied</b> have you been with the amount of emotional closeness during sexual activity between you and your partner? | पिछले चार सप्ताह में यौनक्रिया के दौरान आप और आपके साथी के बीच भावनात्मक निकटता से आप <u>कितना समुष्ट</u> थे? | पिछले चार सप्ताह में यौनक्रिया के दौरान आप और आपके साथी के बीच भावनात्मक निकटता से आप <u>कितना समुष्ट</u> थे? | <ul style="list-style-type: none"> <li>No change required.</li> </ul>                                                                              |
| 15) | Over the past 4 weeks, how <b>satisfied</b> have you been with your sexual relationship with your partner?                                            | पिछले चार सप्ताह में आप अपने साथी के साथ यौन संबंध से <u>कितने समुष्ट</u> थे?                                 | पिछले चार सप्ताह में अपने साथी के साथ यौन संबंध से आप <u>कितने समुष्ट</u> थे?                                 | <ul style="list-style-type: none"> <li>The word '<i>aap</i>' (you) was moved closure to '<i>kitne santusht</i>' how satisfied you were?</li> </ul> |
| 16) | Over the past 4 weeks, how <b>satisfied</b> have you been with your overall sexual life?                                                              | पिछले चार सप्ताह में कुल मिलाके आप अपने यौन जीवन से <u>कितने समुष्ट</u> थे?                                   | पिछले चार सप्ताह में कुल मिलाके आप अपने यौन जीवन से <u>कितने समुष्ट</u> थे?                                   | <ul style="list-style-type: none"> <li>No change required</li> </ul>                                                                               |

|     |                                                                                                                                     |                                                                                                                |                                                                                                                       |                                                                                                                                                                                                                                                                                                                                                     |
|-----|-------------------------------------------------------------------------------------------------------------------------------------|----------------------------------------------------------------------------------------------------------------|-----------------------------------------------------------------------------------------------------------------------|-----------------------------------------------------------------------------------------------------------------------------------------------------------------------------------------------------------------------------------------------------------------------------------------------------------------------------------------------------|
| 17) | Over the past 4 weeks, how <b>often</b> did you experience discomfort or pain during vaginal penetration?                           | पिछले चार सप्ताह में योनी में प्रवेश के समय में <u>कितनी बार</u> आपने असहजता या दर्द महसूस किया है?            | पिछले चार सप्ताह में योनी में प्रवेश के समय में <u>कितनी बार</u> आपने असहजता या दर्द महसूस किया है?                   | <ul style="list-style-type: none"> <li>No change required</li> </ul>                                                                                                                                                                                                                                                                                |
| 18) | Over the past 4 weeks, how <b>often</b> did you experience discomfort or pain following vaginal penetration?                        | पिछले चार सप्ताह में योनी में प्रवेश के पश्चात <u>कितनी बार</u> आपको असहजता या दर्द का महसूस हुआ?              | पिछले चार सप्ताह में योनी में प्रवेश के पश्चात <u>कितनी बार</u> आपको असहजता या दर्द का महसूस हुआ?                     | <ul style="list-style-type: none"> <li>Since, '<i>Pravesh ke samay</i>' (<u>during the penetration</u>) and '<i>Pravesh ke paschat</i>' (after penetration) words seemed similar to the participants, hence to make it convenient for them stage of penetration ('<i>Pravesh ke paschat</i>' <u>!Pravesh ke paschat</u>) was underlined.</li> </ul> |
| 19) | Over the past 4 weeks, how would you rate your <b>level</b> (degree) of discomfort or pain during or following vaginal penetration? | पिछले चार सप्ताह में आप योनी में प्रवेश के दौरान या उसके पश्चात असहजता या दर्द के <u>स्तर</u> को कैसे आँकेंगे? | पिछले चार सप्ताह में आप योनी में प्रवेश के दौरान या उसके पश्चात असहजता या दर्द के <u>स्तर</u> (लेवल) को कैसे आँकेंगे? | <ul style="list-style-type: none"> <li>Level word was used as an alternative to <u>star</u>.</li> </ul>                                                                                                                                                                                                                                             |

FSFI: female sexual function index

Dear Jyotsna, thanks for sharing the google form. I have reviewed it and made some changes. a few general observations requiring your attention are: 1) We need to highlight what is mandatory and what is not? For instance, socio-demographic details, FSFI-Hindi are required items, hence should be marked as \* 2) In FSFI-Hindi, we need not to include english term, written in Devnagri, for all the sexuality related terms. For instance, I do not remember we discussed including lubrication () in the Hindi version, it was just geelapan; likewise emotional closeness for भावनात्मक निकटता was not discussed. What we have discussed was सेक्सुअल एक्टिविटी, एक्ससिटमेंट, स्टिमुलेशन and ओर्गास्म). Correct me if i am recalling wrongly. Otherwise The Whole Hindi-Questionnaire Becomes English. Would request you all to again go through the google form and make it in sync with the Hindi-FSFI as this is the most crucial part of the study/questionnaire. Thanks for the efforts.
